# Supplementary material
Source: publisher figshare collection journal article supplement (https://acs.figshare.com/ndownloader/files/5673732)
Supplement: Supplementary file 1 [file 5673732]

# Supporting Information for

## Aggregation Behavior of Doubly Thermoresponsive Polysulfobetaine-*b*-poly(N-isopropylacrylamide) Diblock Copolymers

*Natalya S. Vishnevetskaya,<sup>1</sup> Viet Hildebrand,<sup>2</sup> Bart-Jan Niebuur,<sup>1</sup> Isabelle Grillo,<sup>3</sup>*

*Sergey K. Filippov,<sup>4</sup> André Laschewsky,<sup>2,5,\*</sup> Peter Müller-Buschbaum,<sup>1</sup> and*

*Christine M. Papadakis<sup>1,\*</sup>*

<sup>1</sup> Fachgebiet Physik weicher Materie/Lehrstuhl für Funktionelle Materialien, Physik-Department,  
Technische Universität München, James-Franck-Straße 1, 85748 Garching, Germany

<sup>2</sup> Institut für Chemie, Universität Potsdam, Karl-Liebknecht-Straße 24-25, 14476 Potsdam-Golm,  
Germany

<sup>3</sup> Large Scale Structures Group, Institut Laue-Langevin, 71 avenue des Martyrs, CS 20156,  
38042 Grenoble Cedex 9, France

<sup>4</sup> Institute of Macromolecular Chemistry, Academy of Sciences of the Czech Republic,  
Heyrovsky Sq. 2, 16206 Prague 6, Czech Republic

<sup>5</sup> Fraunhofer Institut für Angewandte Polymerforschung, Geiselbergstr. 69, 14476 Potsdam-Golm, Germany

### **Dynamic Light Scattering (DLS).**

DLS measurements were carried out using a Zetasizer Nano ZS (Malvern) laser particle size analyzer equipped with a 633 nm laser at an angle of 173° (backscattering detection). The maximum particle radius which can be resolved is 1000 nm. The diblock copolymer PSPP<sub>430</sub>-*b*-PNIPAM<sub>200</sub> was measured in salt-free D<sub>2</sub>O. 0.5 mL of sample was mounted in a plastic microcuvette (Malvern). A polymer solution in D<sub>2</sub>O was prepared at 10 g L<sup>-1</sup> at room temperature and was equilibrated for about 2 days in a thermoshaker at 25 °C, i.e. in regime II. Measurements were performed during heating from 20 °C to 60 °C in steps of 5 °C and were repeated 3 times at each temperature. The equilibration time was chosen at 15 min, and the measurement time at 3 min. For data evaluation, the DTS (Nano) software (Malvern) was used, which provides the hydrodynamic radius,  $R_h$ , and the volume fraction of each species (1 or 2) for each of the 3 measurements. The results were averaged.

### **Characterization of the unimers and aggregates using DLS**

The temperature-dependent self-assembly behavior of the diblock copolymer in D<sub>2</sub>O was explored in temperature-resolved DLS measurements. DLS in backscattering geometry was applied in order to minimize the effects of multiple light scattering in the turbid solutions. Moreover, the concentration of PSPP<sub>430</sub>-*b*-PNIPAM<sub>200</sub> in salt-free D<sub>2</sub>O was set to 10 g L<sup>-1</sup> to minimize multiple scattering. Figure S1 presents the DLS data obtained in a heating run from 10 to 60 °C. The measurement step size of 5 °C is large enough to prevent the distortion of the results by hysteresis of the cloud points, which is less than 2 °C.<sup>1,2</sup>

The autocorrelation curves show very slow decays in regime I (which could not be analyzed), fast decays in regime II and intermediate decays in regime III (Figure S1a). Thus, temperature markedly affects the aggregation behavior. Analysis of the curves reveals the presence of 2 types of aggregates in regime II, but only 1 type in regime III. Their hydrodynamic radii and volume fractions are shown in Figure S1b and c.

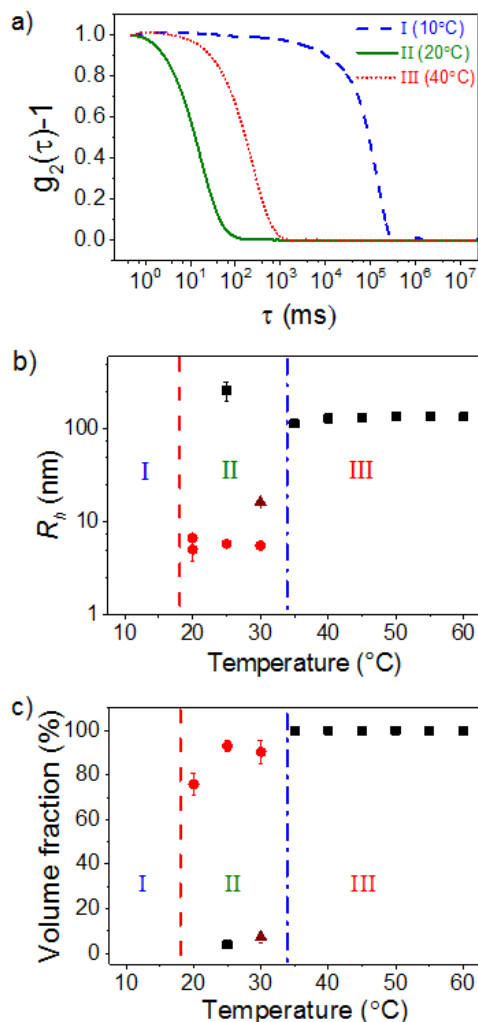

**Figure S1.** Results from DLS on a salt-free solution of PSPP<sub>430</sub>-*b*-PNIPAM<sub>200</sub> in D<sub>2</sub>O at 10 g L<sup>-1</sup>, obtained in a heating run. (a) Normalized intensity autocorrelation functions. Temperatures are indicated in the graph. (b) Hydrodynamic radii and (c) volume fractions of the large aggregates (black squares), micelles (wine triangles) and unimers (red spheres) in dependence on

temperature. The dashed and dash-dotted lines in (b, c) indicate the  $CP_{UCST}$  (red) and  $CP_{LCST}$  (blue) values from turbidimetry, respectively. The regimes I, II and III are indicated.

At temperatures below 19 °C, the size of the large aggregates in regime I could not be quantified because they are larger than the resolution. Thus, we assume the formation of very large aggregates with an average hydrodynamic radius  $R_h > 1000$  nm. Between 20 and 35 °C, i.e. in regime II,  $R_h$  of the majority component (volume fraction 90-96%) is  $5.5 \pm 0.2$  nm, which presumably corresponds to unimers; the minority component (remaining 4-10 %) are particles with  $R_h = 260 \pm 60$  nm at 25 °C and  $R_h = 16.2 \pm 0.2$  nm at 30 °C. The latter may tentatively be ascribed to micelles. Above 30 °C in regime III, only one component with  $R_h = 133 \pm 8$  nm is observed. The aggregates observed in regime III are considerably smaller than those in regime I.

Thus, the results from temperature-resolved DLS measurements in backscattering geometry are in good agreement with those from turbidity measurements: In regime I, the solution is completely turbid with very large aggregates,  $R_h > 1000$  nm; in regime II, the solution is clear containing mostly unimers having  $R_h = 5.5 \pm 0.2$  nm; and in regime III, the solution is cloudy (partially turbid) with aggregates having  $R_h$  values of ca. 133 nm.

---

<sup>1</sup> Arotçaréna, M.; Heise, B.; Ishaya, S.; Laschewsky, A. *J. Am. Chem. Soc.* **2002**, *124*, 3787-3793.

<sup>2</sup> Hildebrand, V.; Laschewsky, A.; Zehm, D. *J. Biomater. Sci., Polym. Ed.* **2014**, *25*, 1602-1618.
